# Supplementary material
Source: publisher figshare collection journal article supplement (https://acs.figshare.com/ndownloader/files/28972030)
Supplement: Supplementary file 1 [file 28972030]

# Supporting Information

## Unraveling the Atomic Structure of Bulk Binary Ga-Te Glasses with Surprising Nanotectonic Features for Phase-Change Memory Applications

Maria Bokova, Andrey Tverjanovich, Chris J. Benmore, Daniele Fontanari, Anton Sokolov, Maxim Khomenko, Mohammad Kassem, Ilya Ozheredov, and Eugene Bychkov\*

**Figure S1.** Diffraction pattern of MM-Ga<sub>0.15</sub>Te<sub>0.85</sub> and MM-Ga<sub>0.30</sub>Te<sub>0.70</sub>, prepared by mechanical milling (MM).

**Figure S2.** Diffraction patterns of Ga<sub>0.25</sub>Te<sub>0.75</sub> sample after *in situ* diffraction measurements as a function of temperature.

**Figure S3.** Raw Raman data, baseline subtraction and Gaussian fitting for bulk glassy Ga<sub>0.25</sub>Te<sub>0.75</sub>.

**Figure S4.** Structural evolution of ETH-Ga<sub>2</sub>Te<sub>6</sub>H<sub>6</sub> cluster during DFT optimization at 0 K.

**Figure S5.** Gaussian fitting of the X-ray total correlation function for glassy Ga<sub>0.2</sub>Te<sub>0.8</sub>.

**Figure S6.** Nearest neighbor distributions around two-fold and trigonal Te species.

**Figure S7.** Structural references and HP-motifs in supercooled viscous Ga<sub>0.2</sub>Te<sub>0.8</sub> at 600 K.

**Figure S8.** Orientational order parameter  $q$  and  $B(\theta)$  distributions of Te-Ga-Te bond angles for GaTe<sub>3</sub> and GaTe<sub>5</sub> entities in liquid Ga<sub>0.2</sub>Te<sub>0.8</sub>.

**Table S1.** Optimized Geometry Parameters of Size-Limited Ga-Te Clusters Used in DFT Modeling of Vibrational Properties

**Table S2.** Optimized Geometry Parameters of Tellurium Rings Used in DFT Modeling of Vibrational Properties

\* Email: [Eugene.Bychkov@univ-littoral.fr](mailto:Eugene.Bychkov@univ-littoral.fr)

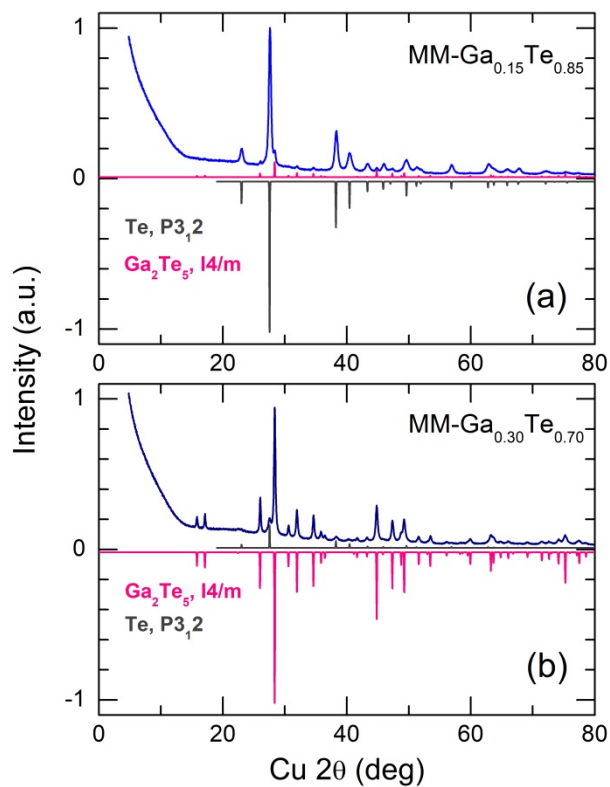

**Figure S1.** Diffraction pattern of (a) MM-Ga<sub>0.15</sub>Te<sub>0.85</sub> and (b) MM-Ga<sub>0.30</sub>Te<sub>0.70</sub>, prepared by mechanical milling (MM). The main crystalline phase in case of MM-Ga<sub>0.15</sub>Te<sub>0.85</sub> is trigonal tellurium, space group  $P3_12$ .<sup>S1</sup> Tetragonal Ga<sub>2</sub>Te<sub>5</sub>,  $I4/m$ ,<sup>S2,S3</sup> appears to be the major crystalline species in MM-Ga<sub>0.30</sub>Te<sub>0.70</sub>.

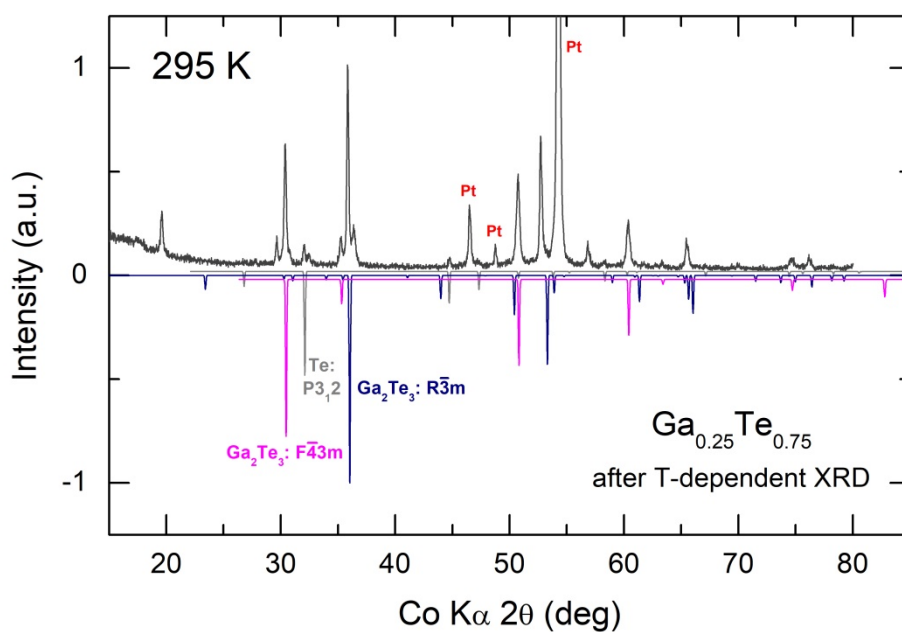

**Figure S2.** Diffraction patterns of Ga<sub>0.25</sub>Te<sub>0.75</sub> sample after *in situ* diffraction measurements as a function of temperature and related crystalline references: cubic Ga<sub>2</sub>Te<sub>3</sub>,<sup>S4</sup> high-pressure rhombohedral Ga<sub>2</sub>Te<sub>3</sub>,<sup>S5</sup> and trigonal tellurium.<sup>S1</sup>

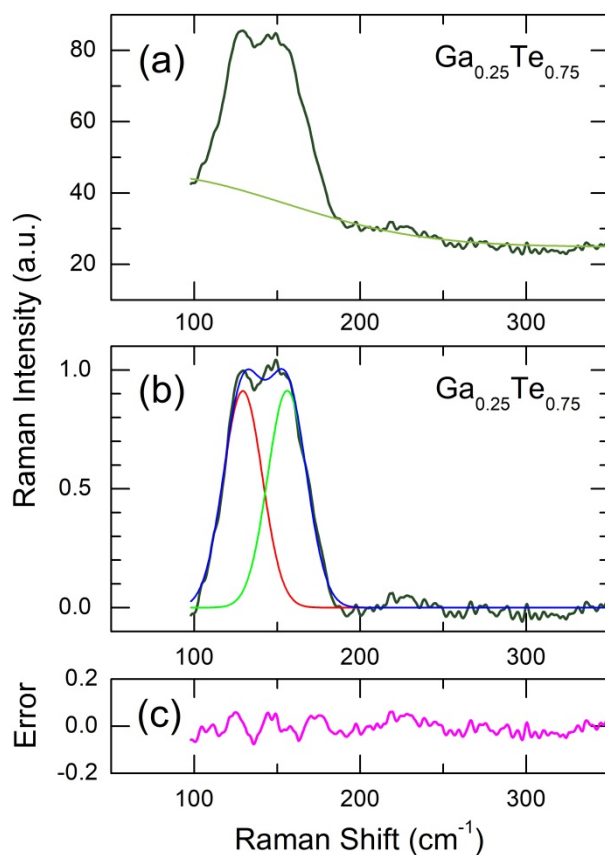

**Figure S3.** (a) Raw Raman data for bulk glassy  $\text{Ga}_{0.25}\text{Te}_{0.75}$  before baseline subtraction, (b) a two-peak Gaussian fitting of the baseline subtracted and normalized Raman spectrum for  $\text{Ga}_{0.25}\text{Te}_{0.75}$ , and (c) difference between experimental and deconvoluted spectra.

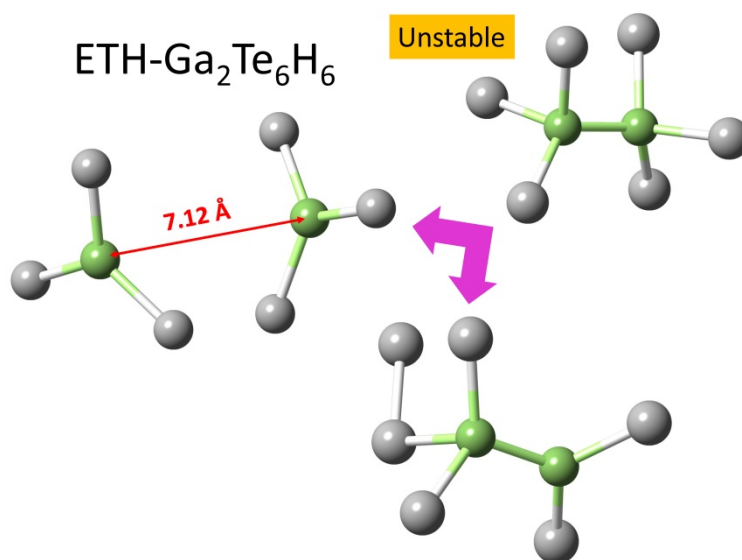

**Figure S4.** Structural evolution of  $\text{ETH-Ga}_2\text{Te}_6\text{H}_6$  cluster during DFT optimization at 0 K. The first scenario consists in a complete separation of the  $\text{ETH-Ga}_2\text{Te}_6\text{H}_6$  cluster into two  $\text{GaTe}_3\text{H}_3$  units of approximate  $D_{3h}$  geometry distant of 7.12 Å. In the second scenario, a tellurium species moves from one gallium toward the other one forming a Te-Te pair. The terminal hydrogen atoms are not shown.

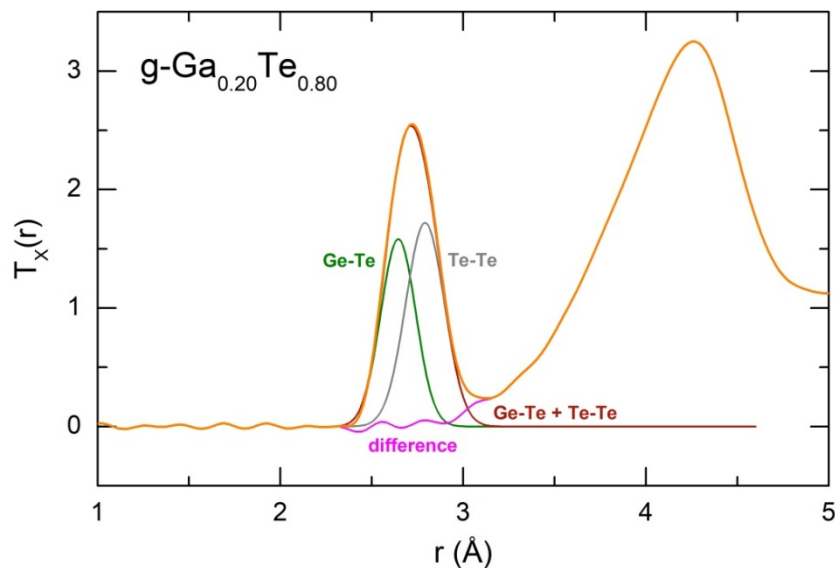

**Figure S5.** Gaussian fitting of the nearest neighbor peak of the X-ray total correlation function  $T_x(r)$  for glassy  $\text{Ga}_{0.2}\text{Te}_{0.8}$ : Ge-Te and Te-Te correlations are shown by the green and gray solid lines, respectively, the difference between experimental and deconvoluted data is drawn as the solid magenta line.

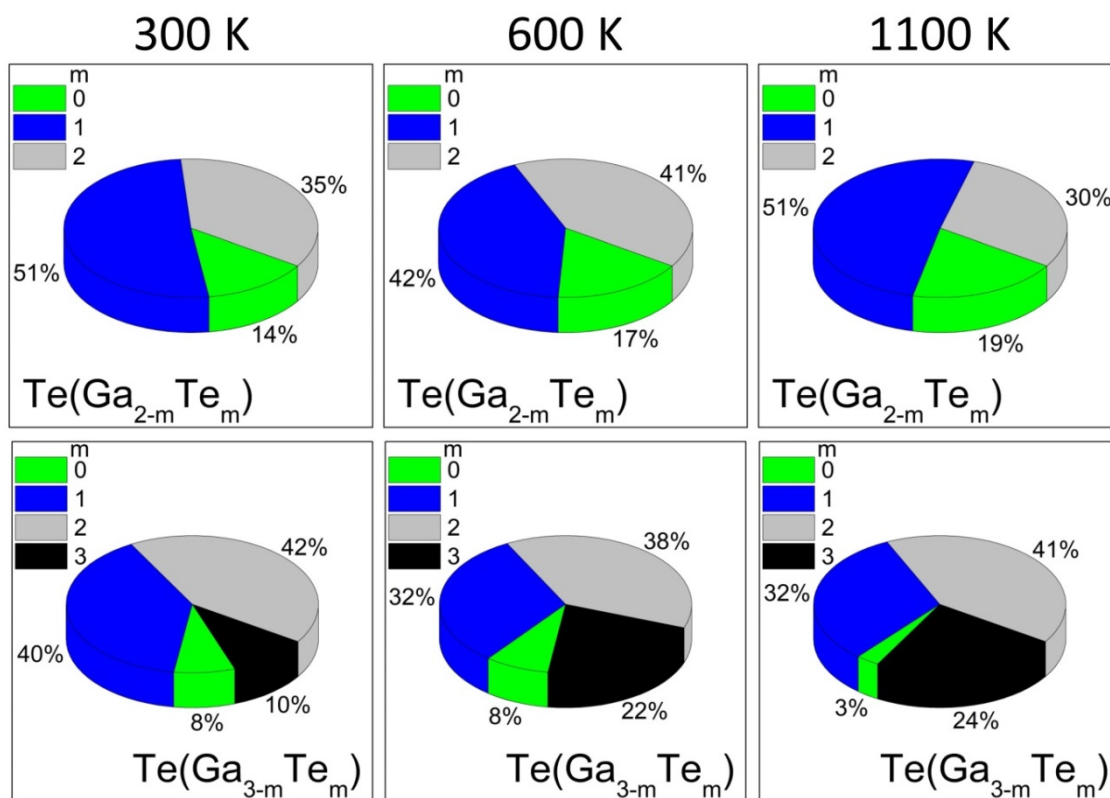

**Figure S6.** Nearest neighbor distributions around two-fold and trigonal Te species at 300, 600 and 1100 K (enlarged insets to Figure 12).

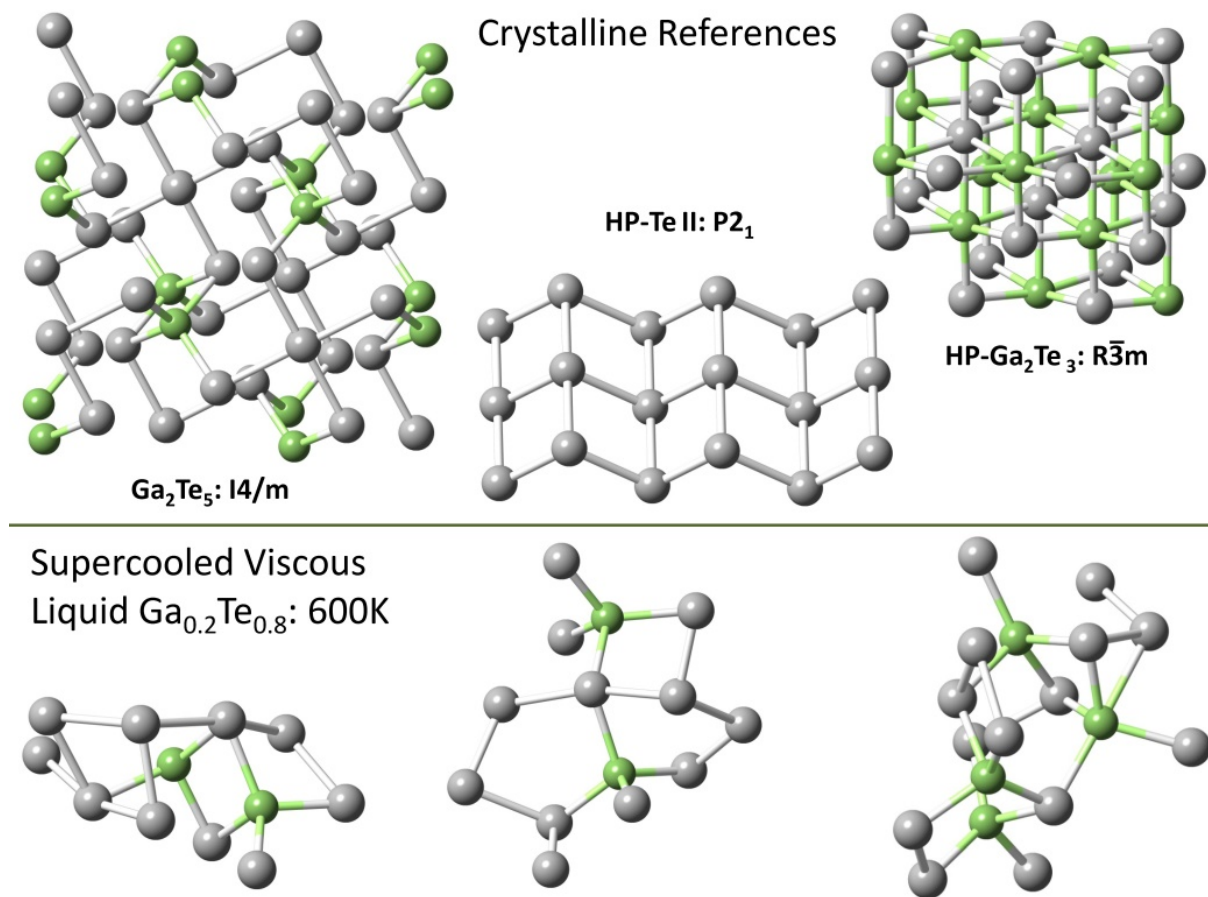

**Figure S7.** Structural references: tetragonal  $\text{Ga}_2\text{Te}_5$ , space group  $I4/m$ ,<sup>S2,S3</sup> monoclinic HP-Te II,  $P2_1$ ,<sup>S6</sup> and rhombohedral HP- $\text{Ga}_2\text{Te}_3$ ,  $R\bar{3}m$ ,<sup>S5</sup> and HP-motifs in supercooled viscous  $\text{Ga}_{0.2}\text{Te}_{0.8}$  at 600 K (FPMD, this work).

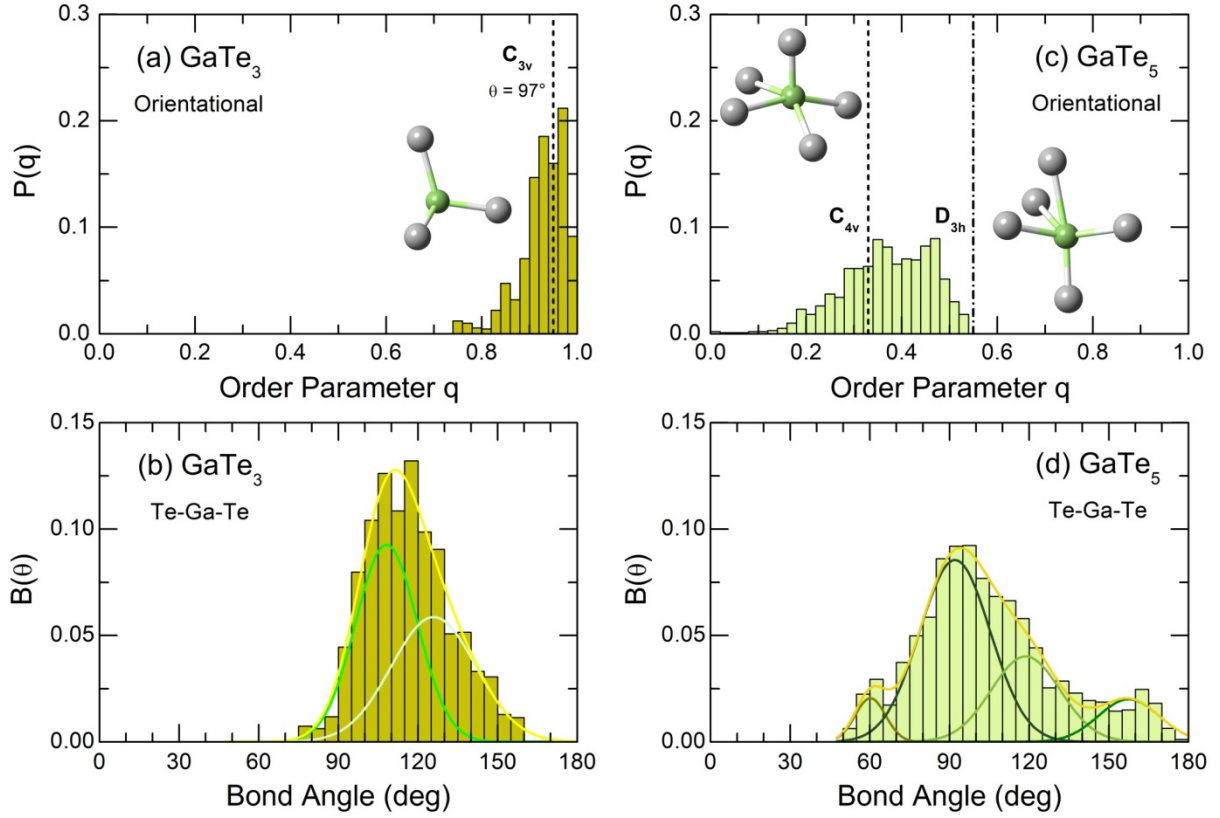

**Figure S8.** Orientational order parameter  $q$  for (a)  $\text{GaTe}_3$  and (b)  $\text{GaTe}_5$  entities in liquid  $\text{Ga}_{0.2}\text{Te}_{0.8}$ , (b,d) corresponding  $B(\theta)$  distributions for Te-Ga-Te bond angles.

Under- and over-coordinated  $\text{GaTe}_3$  and  $\text{GaTe}_5$  units in liquid  $\text{Ga}_{0.2}\text{Te}_{0.8}$  also have variable geometry evidenced by broad  $B_{\text{TeGaTe}}(\theta)$  distributions of the Te-Ga-Te bond angles, Figure S5b,d. Following Ref. [S7-S9], we have used the orientational order parameter  $q$

$$q = 1 - \frac{3}{8} \sum_{j=1}^3 \sum_{k=j+1}^4 \left( \cos \psi_{jk} + \frac{1}{3} \right)^2$$

to determine basic geometry types of these entities. The  $\text{GaTe}_3$  units often have a pyramidal geometry shown in the inset of Figure S5a. Regular pyramids of  $C_{3v}$  symmetry have different  $q$ -values dependent on the Te-Ga-Te angle  $\theta$ :  $q = 1$  for tetrahedral  $\theta_{Td} = 109.47^\circ$ ,  $q = 7/8$  for octahedral  $\theta_{Oh}(2) = \pi/2$ , and finally going to  $q = 0$  at  $\theta \cong 52.45^\circ$ . In addition, flat  $\text{GaTe}_3$  of  $D_{3h}$  symmetry has  $q \cong 0.97$ , and a T-shaped planar unit of  $C_{2v}$  geometry with  $\theta_{Oh}(1) = \pi$  and  $\theta_{Oh}(2) = \pi/2$  reveals  $q = 3/4$ . The  $P(q)$  probability distribution for  $\text{GaTe}_3$  appears to be asymmetric and approximately peaked at  $q = 0.95$ , corresponding to the  $C_{3v}$ -entities with  $\theta \cong 97^\circ$ . The population of flat and defect tetrahedral  $\text{GaTe}_3$  species seems to be superior to that of defect octahedral moieties of both pyramidal and planar geometry.

The five-fold coordinated gallium species mostly have a defect octahedral shape, the inset on the left in Figure S5b. A regular square pyramid of  $C_{4v}$  symmetry with  $\theta_{Oh}(1)$  and  $\theta_{Oh}(2)$  angles is characterized by  $q = 1/3$ , which is close to the maximum of a broad  $P(q)$  distribution for  $\text{GaTe}_5$ . Possible alternative shapes appear to be a trigonal bipyramidal unit of  $D_{3h}$  symmetry having  $q \approx 0.55$ , and a trigonal prism  $\text{GaTe}_5$  without one Te NN. The defect regular prism with identical Ga-Te distances has  $q \cong 0.28$ . The fraction of distorted bipyramids, the inset in Figure S5b, or prisms seems to be small.

**Table S1. Optimized Geometry Parameters (Ga-Te, Ga-Ga and Te-Te Interatomic Distances, Te-Ga-Te and Ga-Te-Ga Bond Angles) of Size-Limited Ga-Te<sup>a</sup> Clusters Used in DFT Modeling of Vibrational Properties**

| Compound Cluster                                 | Ga-Te (Å) | Te-Te (Å)             | Ga-Ga (Å)            | Te-Ga-Te (deg) | Ga-Te-Ga (deg) | X-X-Y (deg) <sup>b</sup> |
|--------------------------------------------------|-----------|-----------------------|----------------------|----------------|----------------|--------------------------|
| GaTe <sub>4</sub> <sup>a</sup>                   | 2.66(8)   | –                     | –                    | 108(14)        | –              | –                        |
| CS-Ga <sub>2</sub> Te <sub>7</sub> <sup>a</sup>  | 2.71(20)  | 2.78                  | 4.08 <sup>c</sup>    | 108(11)        | 103.2          | 94(6)                    |
| ES-Ga <sub>2</sub> Te <sub>6</sub> <sup>a</sup>  | 2.67(9)   | 4.14 <sup>c</sup>     | 3.39 <sup>c</sup>    | 107(20)        | 79(4)          | –                        |
| ES-Ga <sub>3</sub> Te <sub>8</sub> <sup>a</sup>  | 2.67(5)   | 4.17 <sup>c</sup>     | 3.34(1) <sup>c</sup> | 108(14)        | 77.4(4)        | –                        |
| ETH-Ga <sub>2</sub> Te <sub>5</sub> <sup>a</sup> | 2.65(9)   | –                     | 2.50                 | 107(19)        | –              | 116(5)                   |
| Ga <sub>2</sub> Te <sub>5</sub> <sup>S2,S3</sup> | 2.641     | 3.027                 | 3.424                | 110(8)         | 80.1           | 98.8                     |
| Ga <sub>2</sub> Te <sub>3</sub> <sup>S4</sup>    | 2.553     | 4.17 <sup>c</sup>     | 4.17 <sup>c</sup>    | 109.47         | 109.47         | –                        |
| GaTe <sup>S10</sup>                              | 2.67(2)   | 4.22(15) <sup>c</sup> | 2.43(1)              | 105(4)         | 96(4)          | 113(8)                   |

<sup>a</sup> the terminal hydrogen species in the formula are omitted; <sup>b</sup> X = Ga or Te; Y = Ga or Te; <sup>c</sup> the second-neighbor distance

**Table S2. Optimized Geometry Parameters (Te-Te Interatomic Distances and Te-Te-Te Bond Angles) of Tellurium Rings Used in DFT Modeling of Vibrational Properties**

| Compound / Te <sub>n</sub> ring                                         | Te-Te (Å) | Te-Te-Te (deg) |
|-------------------------------------------------------------------------|-----------|----------------|
| Te <sub>6</sub>                                                         | 2.77(8)   | 102(3)         |
| (AgI) <sub>2</sub> (Te <sub>6</sub> ) <sup>S11</sup>                    | 2.74(2)   | 99(2)          |
| Te <sub>8</sub>                                                         | 2.76(1)   | 108(9)         |
| Cs <sub>3</sub> Te <sub>22</sub> (Te <sub>8</sub> rings) <sup>S12</sup> | 2.80(3)   | 100(2)         |

## Supporting References

- (S1) Cherin, P.; Unger, P. Two-Dimensional Refinement of the Crystal Structure of Tellurium. *Acta Crystal.* **1967**, *23*, 670–671.
- (S2) Julien-Pouzol, M.; Jaulmes, S.; Alapini, F. Tellurure de Gallium. *Acta Crystal. B* **1977**, *33*, 2270–2272.
- (S3) Deiseroth, H. J.; Amann, P.; Thurn, H. Die Pentatelluride  $M_2Te_5$  ( $M = Al, Ga, In$ ): Polymorphie, Strukturbeziehungen und Homogenitätsbereiche. *Z. Anorg. Allg. Chem.* **1996**, *622*, 985–993.
- (s4) Guymont, M.; Tomas, A.; Guittard, M. The Structure of  $Ga_2Te_3$ . An X-ray and High-Resolution Electron Microscopy Study. *Phil. Mag. A: Phys. Cond. Matter* **1992**, *66*, 133–139.
- (S5) Serebryanaya, N. R. The Crystal Structure of Pressure-Induced Phases of  $In_2Te_3$  and  $Ga_2Te_3$ . *Powder Diffraction* **1992**, *7*, 99–102.
- (S6) Aoki, K.; Shimomura, O.; Minomura, S. Crystal Structure of the High-Pressure Phase of Tellurium. *J. Phys. Soc. Japan* **1980**, *48*, 551–556.
- (S7) Caravati, S.; Bernasconi, M.; Kühne, T. D.; Krack, M.; Parrinello, M. Coexistence of Tetrahedral- and Octahedral-like Sites in Amorphous Phase Change Materials. *Appl. Phys. Lett.* **2007**, *91*, 171906.
- (S8) Caravati, S.; Bernasconi, M.; Parrinello, M. First-Principles Study of Liquid and Amorphous  $Sb_2Te_3$ . *Phys. Rev. B* **2010**, *81*, 014201.
- (S9) Bouzid, A.; Massobrio, C.; Boero, M.; Ori, G.; Sykina, K.; Furet, E. Role of the van der Waals Interactions and Impact of the Exchange-Correlation Functional in Determining the Structure of Glassy  $GeTe_4$ . *Phys. Rev. B* **2015**, *92*, 134208.
- (S10) Julien-Pouzol, M.; Jaulmes, S.; Guittard, M.; Alapini, F. Monotellurure de Gallium,  $GaTe$ . *Acta Crystal. B* **1979**, *35*, 2848–2851.
- (S11) Deiseroth, H. J.; Wagener, M.; Neumann, E.  $(AgI)_2Te_6$  and  $(AgI)_2Se_6$ : New Composite Materials with Cyclic  $Te_6$  and  $Se_6$  Molecules Stabilized in the "Solid Solvent"  $AgI$ . *Eur. J. Inorg. Chem.* **2004**, *2004*, 4755–4758.
- (S12) W. S. Sheldrick, W. S.; Wachhold, M. Discrete Crown-Shaped  $Te_8$  Rings in  $Cs_3Te_{22}$ . *Angew. Chem. Int. Ed.* **1995**, *34*, 450–451.
